# Supplementary material for: Molecular Insights on the Possible Role of Annexin A2 in COVID-19 Pathogenesis and Post-Infection Complications
Source: MDPI journal article supplement (doi:10.3390/ijms222011028), 2021-10-13
Supplement: s1 [file s1]

## Supplementary File

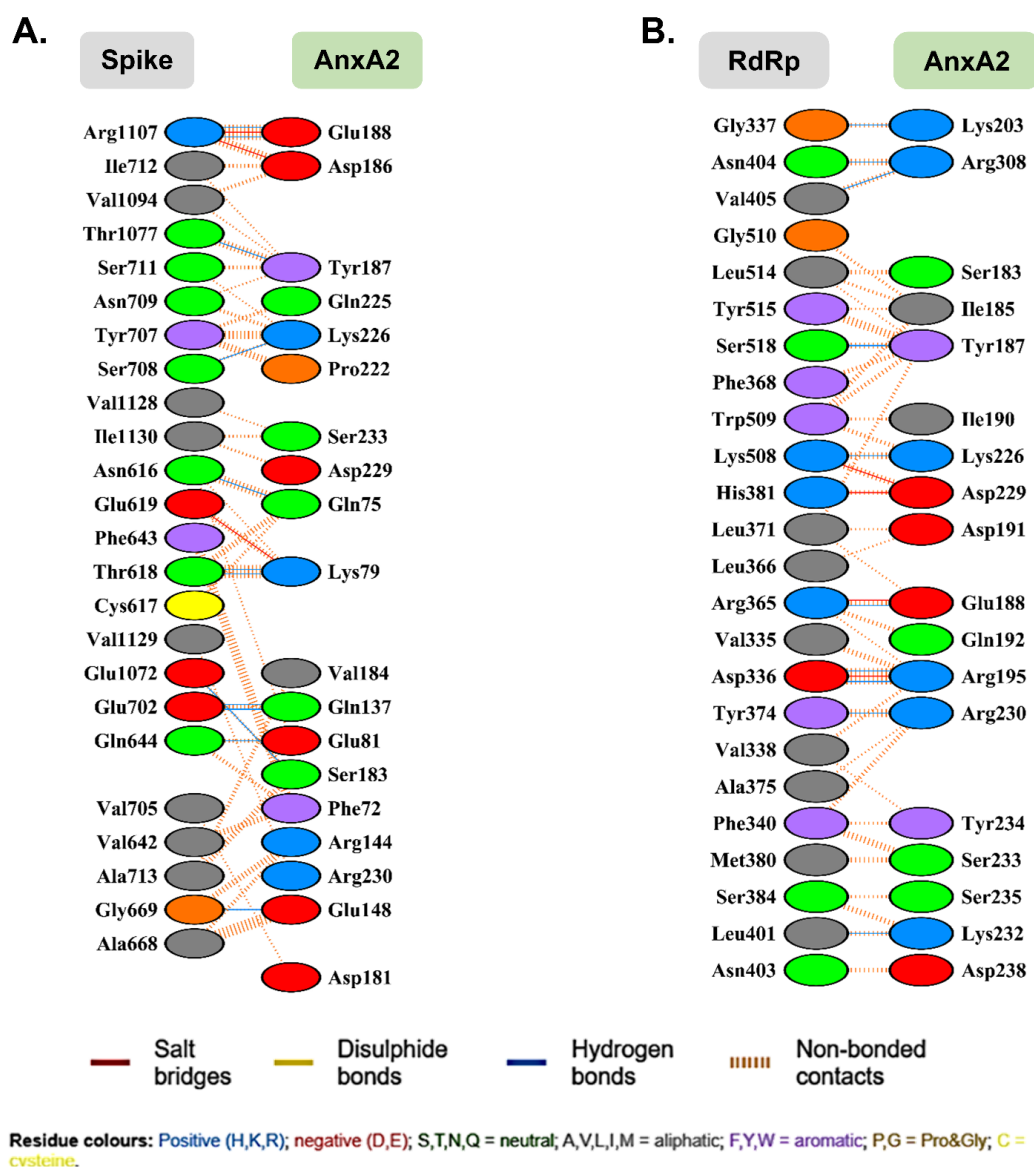

Figure S1. The interacting residues of human AnxA2 bound to spike glycoprotein and RdRp of SARS-CoV-2.
